# Supplementary material
Source: Springer Nature journal article supplement (https://www.springermedizin.de/resource/supplementary/13058_2012_3168_MOESM18_ESM.pdf/9703426)

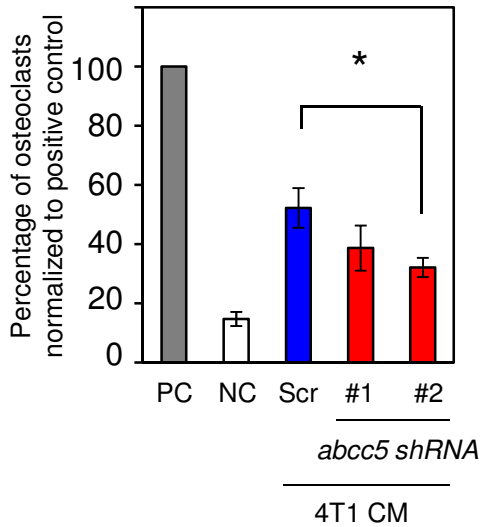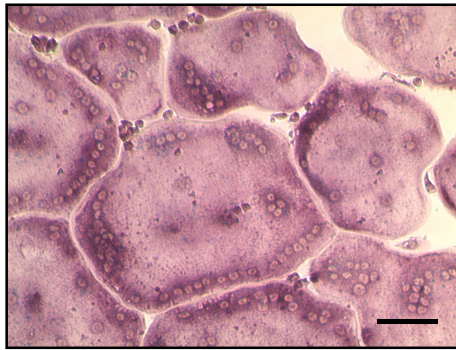

Positive Control (PC)

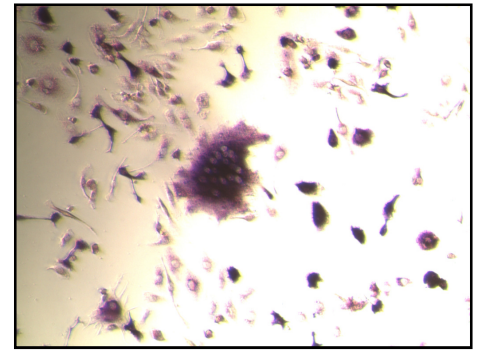

Negative Control (NC)

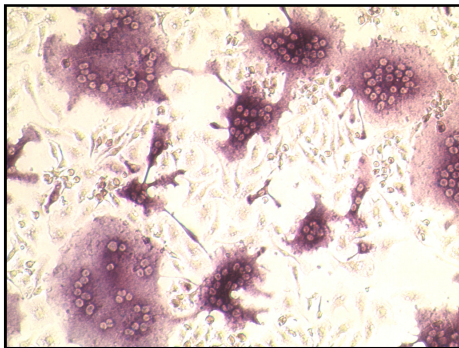

4T1 CM – Scr shRNA

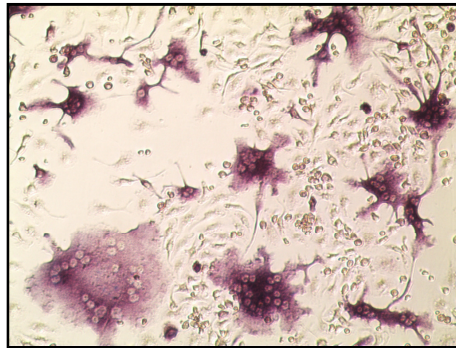

4T1 CM – *abcc5* sh#1

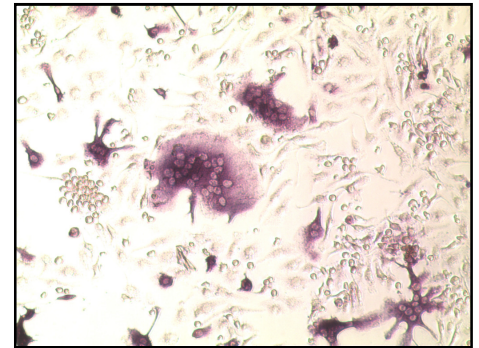

4T1 CM – *abcc5* sh#2

Supplement: MOESM18 [file 9703426]
